# Supplementary material for: The Big Picture of Glioblastoma Malignancy: A Meta-Analysis of Glioblastoma Proteomics to Identify Altered Biological Pathways
Source: PubMed Central journal article supplement — ACS Omega. 2021 Sep 14;6(38):24535–44. doi: 10.1021/acsomega.1c02991 (PMC8482494; doi:10.1021/acsomega.1c02991), 2021-09-14

# The Big Picture of Glioblastoma Malignancy: A Meta-Analysis of Glioblastoma Proteomics to Identify Altered Biological Pathways

*Anna K.W. Tribe, Melanie J. McConnell & Paul H. Teesdale-Spittle\**

School of Biological Sciences, Victoria University of Wellington, Wellington, New Zealand.

## KEYWORDS

Glioblastoma, proteomics, meta-analysis.



Figure S1: Disease-free survival curve for high and low SERPINB1 expression in GBM

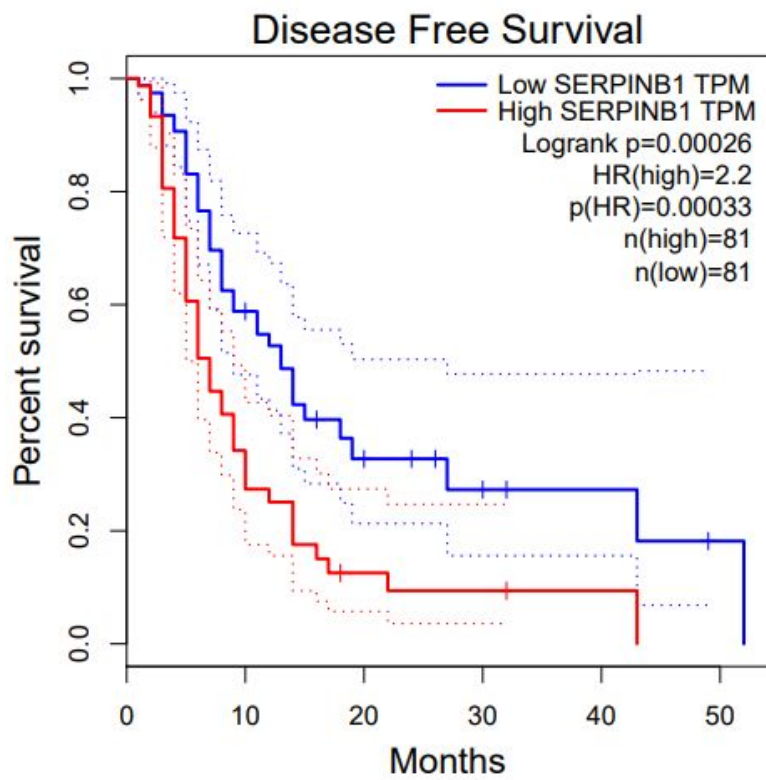

Figure S2: Disease-free survival curve for high and low FERMT3 expression in GBM

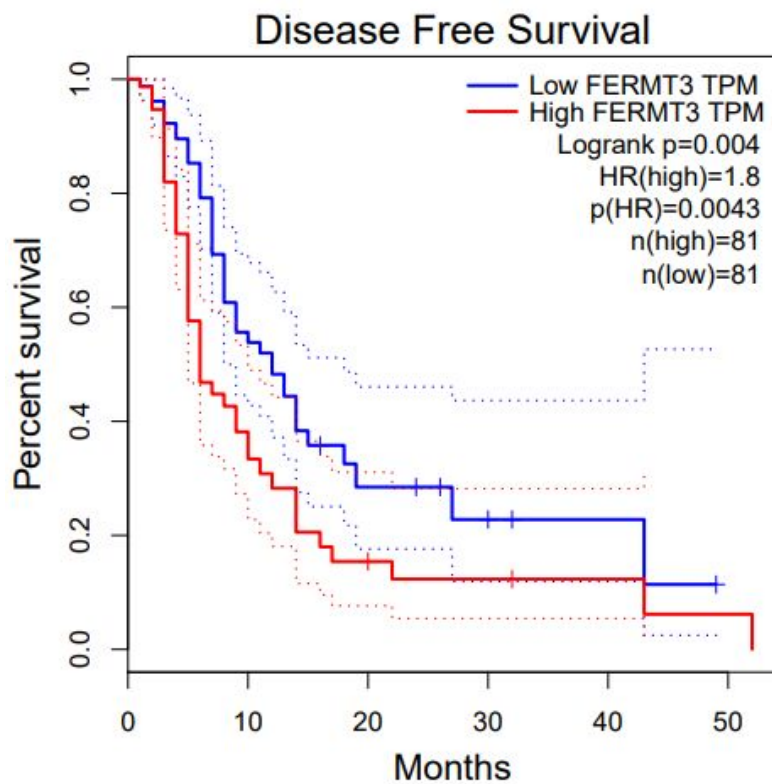

Figure S3: Disease-free survival curve for high and low MMP9 expression in GBM

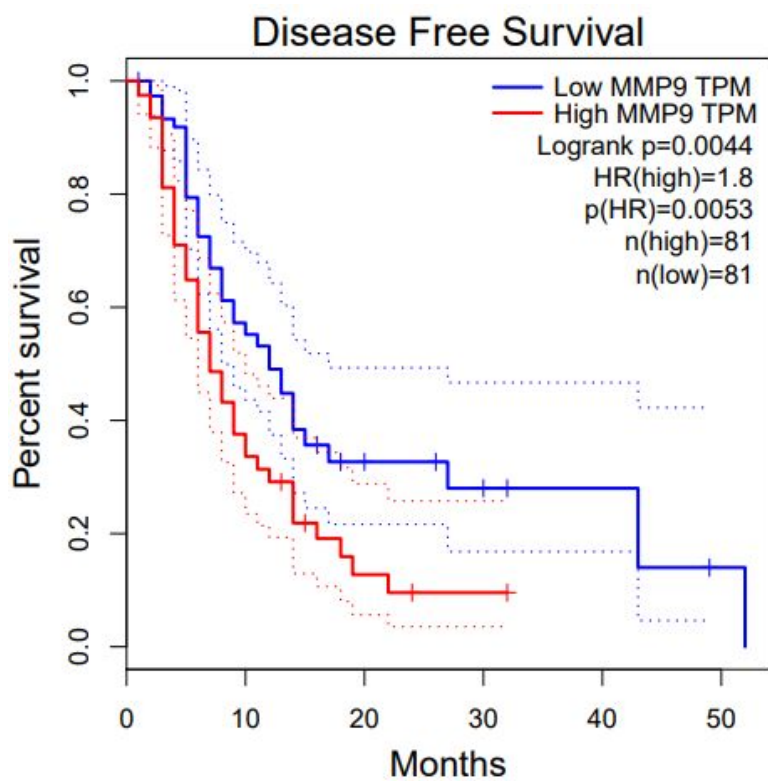

Figure S4: Overall survival curve for high and low NPC2 expression in GBM

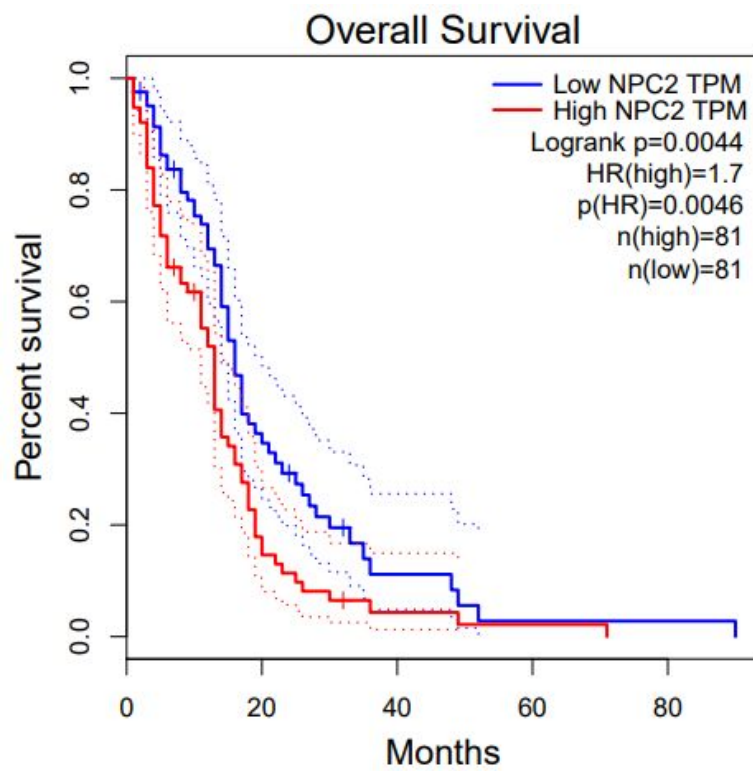

Figure S5: Overall survival curve for high and low COL6A1 expression in GBM

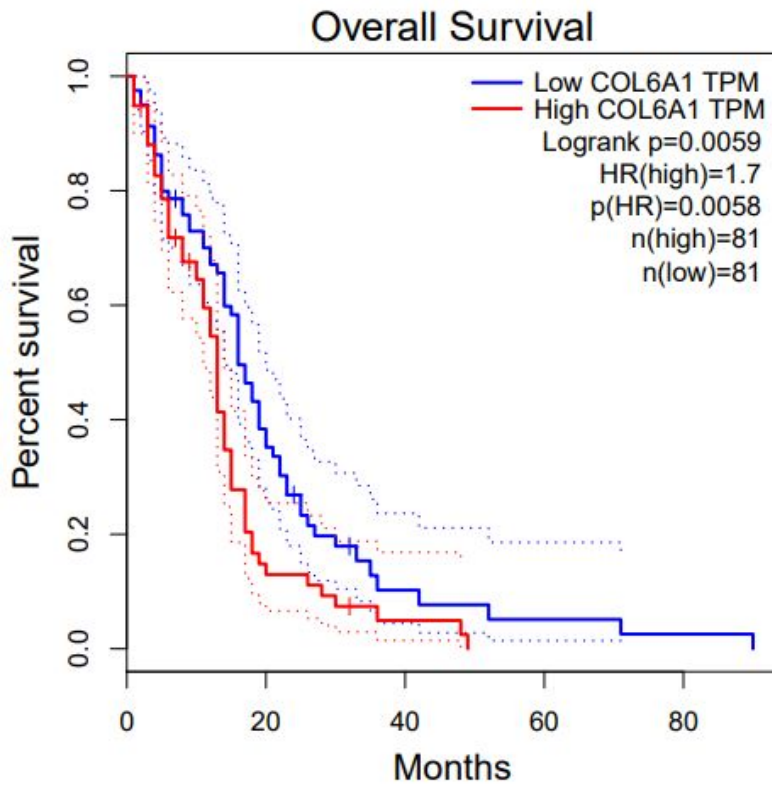

Figure S6: Disease-free survival curve for high and low RPL18 expression in GBM

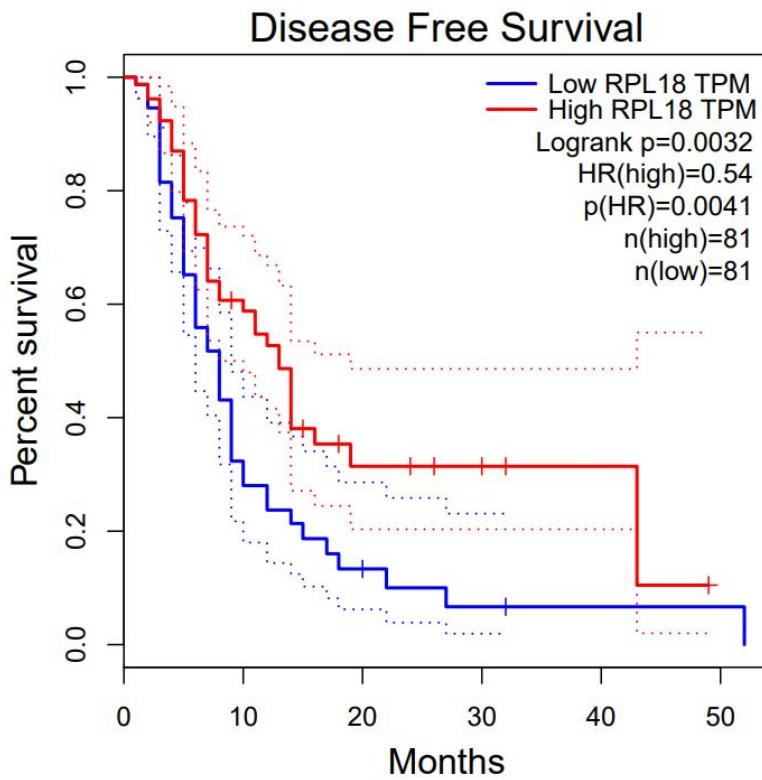

Supplement: ao1c02991_si_002.pdf [file ao1c02991_si_002.pdf]
